# Supplementary material for: Selection of Suitable Genotypes of Lentil (Lens culinaris Medik.) under Rainfed Conditions in South Italy Using Multi-Trait Stability Index (MTSI)
Source: MDPI journal article supplement (doi:10.3390/agronomy11091807), 2021-09-08
Supplement: s1 [file s1]

**Table S1.** Nomenclature of Weather parameters

| Nomenclature |                                                                                      |
|--------------|--------------------------------------------------------------------------------------|
| Tmax_W       | maximum temperature in winter                                                        |
| Tmin_W       | minimum temperature in winter                                                        |
| Rain_W       | rainfall in winter                                                                   |
| nFrost_W     | number of days per month where the minimum temperature dropped below 0 °C in winter, |
| Tavg_Sp      | average temperature in spring                                                        |
| Tmax_Sp      | maximum temperature in spring                                                        |
| Tmin_Sp      | minimum temperature in spring,                                                       |
| Rain_Sp      | rainfall in spring                                                                   |
| nFrost_Sp    | number of days per month where the minimum temperature dropped below 0 °C in spring  |

**Table S2.** Correlations coefficients among yield, yield components (THS, AGB, and HI), and seed quality (protein concentration, fat, starch, protein yield, and ashes) variables for 13 lentil accessions during the 2017 growing season.

| Variables             | Starch   | Ashes    | Protein concentration | Fat      | Protein yield | Yield        | AGB      | THS      | HI       |
|-----------------------|----------|----------|-----------------------|----------|---------------|--------------|----------|----------|----------|
| Starch                | <b>1</b> |          |                       |          |               |              |          |          |          |
| Ashes                 | -0.003   | <b>1</b> |                       |          |               |              |          |          |          |
| Protein concentration | -0.073   | -0.347   | <b>1</b>              |          |               |              |          |          |          |
| Fat                   | -0.198   | -0.454   | 0.396                 | <b>1</b> |               |              |          |          |          |
| Protein yield         | 0.245    | 0.126    | -0.223                | 0.000    | <b>1</b>      |              |          |          |          |
| Yield                 | -0.179   | 0.093    | -0.231                | 0.080    | -0.022        | <b>1</b>     |          |          |          |
| AGB                   | -0.385   | -0.038   | 0.052                 | 0.333    | <b>0.566</b>  | 0.412        | <b>1</b> |          |          |
| THS                   | -0.129   | 0.253    | 0.369                 | 0.107    | 0.143         | 0.418        | 0.390    | <b>1</b> |          |
| HI                    | 0.083    | 0.016    | -0.350                | 0.017    | -0.236        | <b>0.791</b> | -0.121   | 0.181    | <b>1</b> |

Values in bold are different from 0 with a significance level  $\alpha = 0.05$ . AGB: above-ground biomass, HI: harvest index, and THS: 1000-seed weight.
